# Supplementary material for: N-heterocyclic carbenes which readily add ammonia, carbon monoxide and other small molecules,
Source: Royal Society of Chemistry journal article supplement (doi:10.1039/c0sc00451k), 2010-01-01
Supplement: c0sc00451k.pdf [file c0sc00451k.pdf]

## *Electronic Supplementary Information*

### ***N*-heterocyclic carbenes which readily add ammonia, carbon monoxide and other small molecules**

Ulrich Siemeling,<sup>\*a</sup> Christian Färber,<sup>a</sup> Clemens Bruhn,<sup>a</sup> Michael Leibold,<sup>a</sup> Detlef Selent,<sup>b</sup> Wolfgang Baumann,<sup>b</sup> Moritz von Hopffgarten,<sup>c</sup> Catharina Goedecke,<sup>c</sup> and Gernot Frenking<sup>\*c</sup>

<sup>a</sup> Institut für Chemie, Universität Kassel, Heinrich-Plett-Str. 40, 34132 Kassel, Germany. Fax: +49-561-804-4777; Tel: +49-561-804-4576; E-mail: siemeling@uni-kassel.de

<sup>b</sup> Leibniz Institute for Catalysis e. V. at the University of Rostock, Albert-Einstein-Str. 29a, 18059 Rostock, Germany.

<sup>c</sup> Fachbereich Chemie, Philipps-Universität Marburg, Hans-Meerwein-Str., 35032 Marburg, Germany. Fax: +49-6421-28-25566; Tel: 49-6421-28-25563; E-mail: frenking@chemie.uni-marburg.de

## **Methods**

### **Chemical syntheses**

#### **General**

All reactions were carried out under N<sub>2</sub> in oven-dried glassware by applying standard Schlenk techniques. Solvents were dried and freshly distilled from the drying agent indicated prior to use (THF and hexanes: potassium, toluene: sodium). *N*-heterocyclic carbene **5-Np**<sup>S1</sup> and acyclic diaminocarbene **13-iPr**<sup>S2</sup> were prepared according to the literature procedures. NMR: Varian MR 400 spectrometer operating at 399.87 MHz for <sup>1</sup>H. *In situ* NMR investigations: Bruker Avance 400 spectrometer utilising a modified 10 mm sapphire HP-NMR tube; gas feed, circulation, flow regulation, pressure adjustment *etc.* have been detailed elsewhere.<sup>S3</sup> Chemical shifts (<sup>15</sup>N) are given relative to nitromethane ( $\mathcal{E} = 10.136767$  MHz<sup>S4</sup>). IR: Bruker Alpha FT-IR spectrometer. Electrospray ionisation (ESI) mass spectra: Finnigan LCQ Deca. High-resolution mass spectra (HRMS): Bruker Daltonics micrOTOF. Melting points: Stuart Scientific smp 3 melting point apparatus. Elemental analyses were performed by the microanalytical laboratory of the University of Kassel.

### Synthesis of 6-Np

Aniline (5.0  $\mu$ l, 0.055 mmol) was added to a solution of **5-Np** (18.3 mg, 0.050 mmol) in THF (1 ml). The mixture was stirred for 10 min. Removal of volatile components in vacuo left the product in quantitative yield as a red oil, which was pure according to NMR spectroscopy.  $^1\text{H}$  NMR ( $\text{C}_6\text{D}_6$ ):  $\delta$  8.43 (br. s, 1H), 7.30–7.21 (m, 4H), 7.05–7.00 (m, 1H), 4.10 (br. s, 2H), 3.89 (m, 2H), 3.82 (m, 2H), 3.71 (br. s, 4H), 2.57 (d,  $J = 7.0$  Hz, 2H), 2.16 (br. s, 1H), 0.96 (s, 9H), 0.84 (s, 9H);  $^{13}\text{C}$  NMR ( $\text{C}_6\text{D}_6$ )  $\delta$  153.0, 152.9, 129.5, 123.2, 121.6, 113.2, 105.2, 64.8, 64.2, 61.8, 59.4, 58.2, 56.8, 34.3, 31.6, 28.9, 27.6; IR (KBr): 3388 (m), 3085 (m), 2954 (s), 2867 (s), 1749 (s), 1627 (s), 1590 (s), 1364 (s), 1191 (s)  $\text{cm}^{-1}$ ; HRMS/ESI(+)  $m/z$  459.234401 [ $\text{M} + \text{H}$ ] $^+$ , calcd. for  $[\text{C}_{27}\text{H}_{37}\text{FeN}_3]^+$  459.233142.

### Synthesis of 7-Np

Ammonia (5 ml) was condensed on sodium metal (ca. 2 g) and subsequently recondensed into a stirred solution of **5-Np** (76.3 mg, 0.208 mmol) in THF (2 ml) kept in a separate flask at  $-80$   $^\circ\text{C}$ . The mixture was stirred for 10 min and then allowed to warm to room temperature with evaporation of ammonia. Removal of volatile components in vacuo left the product in quantitative yield as a brownish oil, which was pure according to NMR spectroscopy.  $^1\text{H}$  NMR ( $\text{C}_6\text{D}_6$ ):  $\delta$  8.17 (d,  $J = 10.0$  Hz, 1H), 6.76 (d,  $J = 11.7$  Hz, 1H), 4.10 (s, 2H), 3.89 (s, 2H), 3.83 (s, 2H), 3.75 (s, 2H), 3.58 (s, 2H), 2.62 (d,  $J = 6.8$  Hz, 2H), 2.44 (br. s, 1H), 0.93 (s, 18 H);  $^{13}\text{C}$  NMR ( $\text{C}_6\text{D}_6$ )  $\delta$  157.8, 111.7, 103.9, 63.0, 62.5, 59.8, 58.1, 55.4, 33.0, 30.2, 27.5, 26.5; IR (KBr): 3381 (m), 3315 (m), 3091 (m), 2954 (s), 2867 (s), 1627 (s), 1615 (s), 1479 (s), 1365 (s)  $\text{cm}^{-1}$ ; HRMS/ESI(+)  $m/z$  384.210618 [ $\text{M} + \text{H}$ ] $^+$ , calcd. for  $[\text{C}_{21}\text{H}_{33}\text{FeN}_3]$  384.209667.

### Synthesis of 8-Np

Methyl acrylate (14  $\mu$ l, 0.154 mmol) was added to a solution of **5-Np** (31.6 mg, 0.086 mmol) in THF (1 ml). The mixture was stirred for 15 min. Volatile components were subsequently removed in vacuo and the oily, yellowish residue crystallised from hexanes affording the product as yellow crystals (20.1 mg, 52%). mp  $140$ – $142$   $^\circ\text{C}$ ;  $^1\text{H}$  NMR ( $\text{C}_6\text{D}_6$ ):  $\delta$  4.17 (m, 1H), 4.14 (m, 1H), 4.12 (m, 1H), 4.09 (m, 1H), 3.91 (m, 1H), 3.46 (m, 1H), 3.39 (s, 3H), 2.97 (d,  $J = 13.7$  Hz, 1H), 2.84 (d,  $J = 13.8$  Hz, 1H), 2.80 (d,  $J = 13.8$  Hz, 1H), 2.65 (d,  $J = 13.7$  Hz, 1H), 2.33 (dd,  $J_1 = 6.8$  Hz,  $J_2 = 8.9$  Hz, 1H), 1.94 (dd,  $J_1 = 4.7$  Hz,  $J_2 = 6.8$  Hz, 1H), 1.53 (dd,  $J_1 = 4.7$  Hz,  $J_2 = 8.9$  Hz, 1H), 1.07 (s, 9H), 0.83 (s, 9H);  $^{13}\text{C}$  NMR ( $\text{C}_6\text{D}_6$ )  $\delta$  169.7, 102.9, 102.6, 82.3, 69.8, 69.5, 68.9, 68.8, 65.3, 65.1, 65.0, 62.4, 59.2, 58.8, 51.4, 37.4, 34.5, 33.8,

29.2, 28.9, 21.9; IR (KBr): 2952 (s), 1743 (s), 1470 (s)  $\text{cm}^{-1}$ ; HRMS/ESI(+)  $m/z$  453.220272  $[\text{M} + \text{H}]^+$ , calcd. for  $[\text{C}_{25}\text{H}_{37}\text{FeN}_2\text{O}_2]^+$  453.219897; elemental analysis calcd. (%) for  $\text{C}_{25}\text{H}_{36}\text{FeN}_2\text{O}_2$ : C 66.37, H 8.02, N 6.19; found C 65.92, H 8.16, N 6.22.

### Synthesis of 9-Np

*tert*-Butyl isocyanide (20  $\mu\text{l}$ , 0.177 mmol) was added to a solution of **5-Np** (57.1 mg, 0.156 mmol) in toluene (1.5 ml). The mixture was stirred for 1 h. The solution was subsequently concentrated and stored at  $-40^\circ\text{C}$  to afford the product as an orange, microcrystalline solid (50.3 mg, 72%). mp  $118\text{--}120^\circ\text{C}$ . Crystals suitable for an X-ray diffraction study were obtained from an oversaturated toluene solution at room temperature.  $^1\text{H}$  NMR ( $\text{C}_6\text{D}_6$ , recorded at  $46^\circ\text{C}$ ):  $\delta$  4.09 (br. s, 4H), 3.97 (s, 4H), 3.00 (s, 4H), 1.27 (s, 9H), 0.99 (s, 18 H);  $^{13}\text{C}$  NMR ( $\text{C}_6\text{D}_6$ )  $\delta$  192.9, 116.0, 105.1, 68.0, 59.3, 34.7, 31.0, 29.1; IR (KBr): 2017 (s)  $\text{cm}^{-1}$ ; HRMS/ESI(+)  $m/z$  450.256204  $[\text{M} + \text{H}]^+$ , calcd. for  $[\text{C}_{26}\text{H}_{40}\text{FeN}_3]^+$  450.256617; elemental analysis calcd. (%) for  $\text{C}_{26}\text{H}_{39}\text{FeN}_3$ : C 69.49, H 8.75, N 9.35; found C 69.15, H 8.82, N 9.17.

### Synthesis of 11-Np

**5-Np** (29.0 mg, 0.079 mmol) was placed in a one-necked 50 ml flask equipped with a balloon and dissolved in toluene (1.5 ml). The inert gas atmosphere was replaced by a slight overpressure of carbon monoxide. The reaction mixture was stirred for 3 d. The mixture was filtered and the filtrate concentrated to ca. 0.5 ml, whereupon crystallisation started. The product was isolated as yellow-brown crystals, which were suitable for an X-ray diffraction study (19.0 mg, 63%). mp  $160^\circ\text{C}$  (dec.);  $^1\text{H}$  NMR ( $\text{C}_6\text{D}_6$ ):  $\delta$  5.21 (d,  $J = 13.7$  Hz, 1H), 4.88 (d,  $J = 13.5$  Hz, 1H), 4.60 (s, 1H), 4.51 (s, 1H), 4.44 (s, 1H), 4.40 (s, 1H), 4.25 (s, 1H), 4.20 (s, 1H), 4.17 (s, 1H), 4.11 (s, 1H), 4.03 (s, 1H), 3.98 (s, 1H), 3.97 (s, 1H), 3.94 (s, 1H), 3.89 (s, 1H), 3.86 (s, 1H), 3.83 (s, 1H), 3.80 (s, 1H), 3.71 (d,  $J = 13.5$  Hz, 1H), 3.40 (d,  $J = 13.7$  Hz, 1H), 3.35 (d,  $J = 13.1$  Hz, 1H), 3.27 (d,  $J = 13.7$  Hz, 1H), 3.11 (d,  $J = 13.1$  Hz, 1H), 3.08 (d,  $J = 13.7$  Hz, 1H), 1.42 (s, 9H), 1.19 (s, 9H), 1.08 (s, 9H), 1.07 (s, 9H);  $^{13}\text{C}$  NMR ( $\text{C}_6\text{D}_6$ )  $\delta$  176.9, 148.0, 136.3, 106.9, 105.6, 95.4, 94.5, 72.4, 72.1, 71.6, 71.4, 71.1, 70.3, 69.9, 69.3, 68.9, 68.8, 68.5, 67.7, 67.65, 67.6, 67.4, 67.1, 65.2, 63.3, 62.4, 60.3, 34.4, 33.6, 33.4, 33.0, 30.6, 30.1, 29.7, 21.6; IR (KBr): 1600 (s)  $\text{cm}^{-1}$ ; MS/ESI(+)  $m/z$  761.32  $[\text{M} + \text{H}]^+$  (100%); elemental analysis calcd. (%) for  $\text{C}_{43}\text{H}_{60}\text{Fe}_2\text{N}_4\text{O}$ : C 67.90, H 7.95, N 7.37; found C 67.61, H 8.03, N 7.13.

### Synthesis of 16-*i*Pr

A 10 mm sapphire HP-NMR tube was charged with a solution of **13-*i*Pr** (57 mg, 0.27 mmol) in toluene-*d*<sub>8</sub> (2.4 ml). CO (1 bar) was bubbled through the solution at -50 °C. The solution was allowed to warm in 5 °C steps and was continuously monitored by NMR spectroscopy during this process. No reaction was observed below -20 °C. A slow progress in product formation was observed at -15 °C. The NMR data revealed no further species apart from the starting materials and the product. The reaction was completed by storing the solution under an atmosphere of CO (20 bar) at room temperature overnight. Volatile components were removed in vacuo, leaving the product as a light yellow oil in essentially quantitative yield. <sup>1</sup>H NMR (toluene-*d*<sub>8</sub>): δ 3.64 (s, 1H), 3.22 (sept, *J* = 6.8 Hz, 1H, CH N-*i*Pr), 2.99 (m, 2H, CH N-*i*Pr<sub>2</sub>), 1.09 and 0.85 (2 d, 6H each, Me N-*i*Pr<sub>2</sub>), 1.08 and 1.07 (2 d, *J* = 6.8 Hz, 3H each, Me N-*i*Pr), 1.02 and 0.92 (2 s, 3H each, CMe<sub>2</sub>); <sup>13</sup>C NMR (toluene-*d*<sub>8</sub>) δ 167.4 (CO), 74.2 (CH), 62.5 (CMe<sub>2</sub>), 47.7 (br., CH N-*i*Pr<sub>2</sub>), 44.0 (CH N-*i*Pr), 25.2 and 22.5 (CMe<sub>2</sub>), 23.9 and 21.9 (br., Me N-*i*Pr<sub>2</sub>), 22.3 and 21.7 (Me N-*i*Pr); <sup>15</sup>N NMR (benzene-*d*<sub>6</sub>) δ -218.5 (amide), -331.0 (amine); IR (KBr): 2964 (s), 1741 (s) cm<sup>-1</sup>; HRMS/ESI(+) *m/z* 241.226792 [M + H]<sup>+</sup>, calcd. for [C<sub>14</sub>H<sub>29</sub>N<sub>2</sub>O]<sup>+</sup> 241.227440.

### Single-crystal X-ray diffraction analyses

#### General

For each data collection a single crystal was mounted on a glass fibre and all geometric and intensity data were taken from this sample. Data collection using MoK $\alpha$  radiation ( $\lambda = 0.71073$  Å) was made on a Stoe IPDS2 diffractometer equipped with a 2-circle goniometer and an area detector. Absorption correction was done by integration using X-red.<sup>S5</sup> The data sets were corrected for Lorentz and polarisation effects. The structures were solved by direct methods (SHELXS97) and refined using alternating cycles of least squares refinements against  $F^2$  (SHELXL97).<sup>S6</sup> All non-H atoms were found in difference Fourier maps and were refined with anisotropic displacement parameters. H atoms were placed in constrained positions according to the riding model with the 1.2 fold isotropic displacement parameters.

#### Compound 8-Np

C<sub>25</sub>H<sub>36</sub>FeN<sub>2</sub>O<sub>2</sub>,  $M = 452.41$ , yellow (0.29 × 0.10 × 0.06 mm),  $T = 203(2)$  K, monoclinic, space group  $P 2_1/c$ ,  $a = 12.1007(16)$ ,  $b = 17.090(2)$ ,  $c = 11.5086(13)$  Å,  $\beta = 97.616(10)^\circ$ ,  $V = 2359.0(5)$  Å<sup>3</sup>,  $Z = 4$ ,  $\mu = 0.662$  mm<sup>-1</sup>,  $\rho(\text{calc.}) = 1.274$  Mg/m<sup>3</sup>, 11142 measured refl., 2151 refl. observed ( $I > 2\sigma(I)$ ), 4155 unique refl. ( $R_{\text{int}} = 0.0755$ ), 278 parameters refined, 0 restraints,

residual max./ min. electron densities after final Fourier synthesis 0.398/  $-0.243 \text{ e}\text{\AA}^{-3}$ , final  $R$  indices  $R1 (I > 2\sigma(I)) = 0.0474$ ,  $wR2$  (all data) = 0.0719.

### Compound 9-Np

$\text{C}_{26}\text{H}_{39}\text{FeN}_3$ ,  $M = 449.45$ , yellow ( $0.32 \times 0.15 \times 0.04 \text{ mm}$ ),  $T = 223(2) \text{ K}$ , monoclinic, space group  $P 2_1/n$ ,  $a = 15.253(2)$ ,  $b = 9.8425(17)$ ,  $c = 16.706(2) \text{ \AA}$ ,  $\beta = 95.195(11)^\circ$ ,  $V = 2497.8(7) \text{ \AA}^3$ ,  $Z = 4$ ,  $\mu = 0.620 \text{ mm}^{-1}$ ,  $\rho(\text{calc.}) = 1.195 \text{ Mg/m}^3$ , 13276 measured refl., 2277 refl. observed ( $I > 2\sigma(I)$ ), 4397 unique refl. ( $R_{\text{int}} = 0.0846$ ), 280 parameters refined, 0 restraints, residual max./ min. electron densities after final Fourier synthesis 0.352/  $-0.228 \text{ e}\text{\AA}^{-3}$ , final  $R$  indices  $R1 (I > 2\sigma(I)) = 0.0482$ ,  $wR2$  (all data) = 0.0858.

### Compound 11-Np

$\text{C}_{43}\text{H}_{60}\text{Fe}_2\text{N}_4\text{O}$ ,  $M = 760.65$ , yellow ( $0.55 \times 0.28 \times 0.01 \text{ mm}$ ),  $T = 173(2) \text{ K}$ , monoclinic, space group  $P 2_1/c$ ,  $a = 16.3194(13)$ ,  $b = 10.7454(5)$ ,  $c = 22.9601(17) \text{ \AA}$ ,  $\beta = 97.397(6)^\circ$ ,  $V = 3992.7(5) \text{ \AA}^3$ ,  $Z = 4$ ,  $\mu = 0.764 \text{ mm}^{-1}$ ,  $\rho(\text{calc.}) = 1.265 \text{ Mg/m}^3$ , 25199 measured refl., 4350 refl. observed ( $I > 2\sigma(I)$ ), 7035 unique refl. ( $R_{\text{int}} = 0.0856$ ), 459 parameters refined, 0 restraints, residual max./ min. electron densities after final Fourier synthesis 2.219/  $-0.850 \text{ e}\text{\AA}^{-3}$ , final  $R$  indices  $R1 (I > 2\sigma(I)) = 0.0981$ ,  $wR2$  (all data) = 0.3049.

**CCDC 782899–782901** contain the supplementary crystallographic data for this publication. This information can be obtained free of charge from the Cambridge Crystallographic Data Centre via [www.ccdc.cam.ac.uk/data\\_request/cif](http://www.ccdc.cam.ac.uk/data_request/cif).

## Computational Details

The geometries of the molecules were optimised at the gradient corrected DFT level of theory using Becke's exchange functional<sup>S7</sup> in conjunction with Perdew's correlation functional<sup>S8</sup> with the *Gaussian03* program package.<sup>S9</sup> Ahlrich's def2-SVP basis set<sup>S10</sup> was used. This level of theory is denoted as BP86/def2-SVP. Stationary points were characterised with frequency calculations at BP86/def2-SVP. Thermodynamic corrections were taken from the frequency calculations. All relative energies given in this work include zero-point corrections. Intrinsic reaction coordinate (IRC) calculations were carried out to establish the transition states as the connections of reactants and products. For some molecules, singlepoint calculations at the

BP86/def2-TZVPP<sup>S10</sup> level were carried out using the geometries optimised at BP86/def2-SVP.

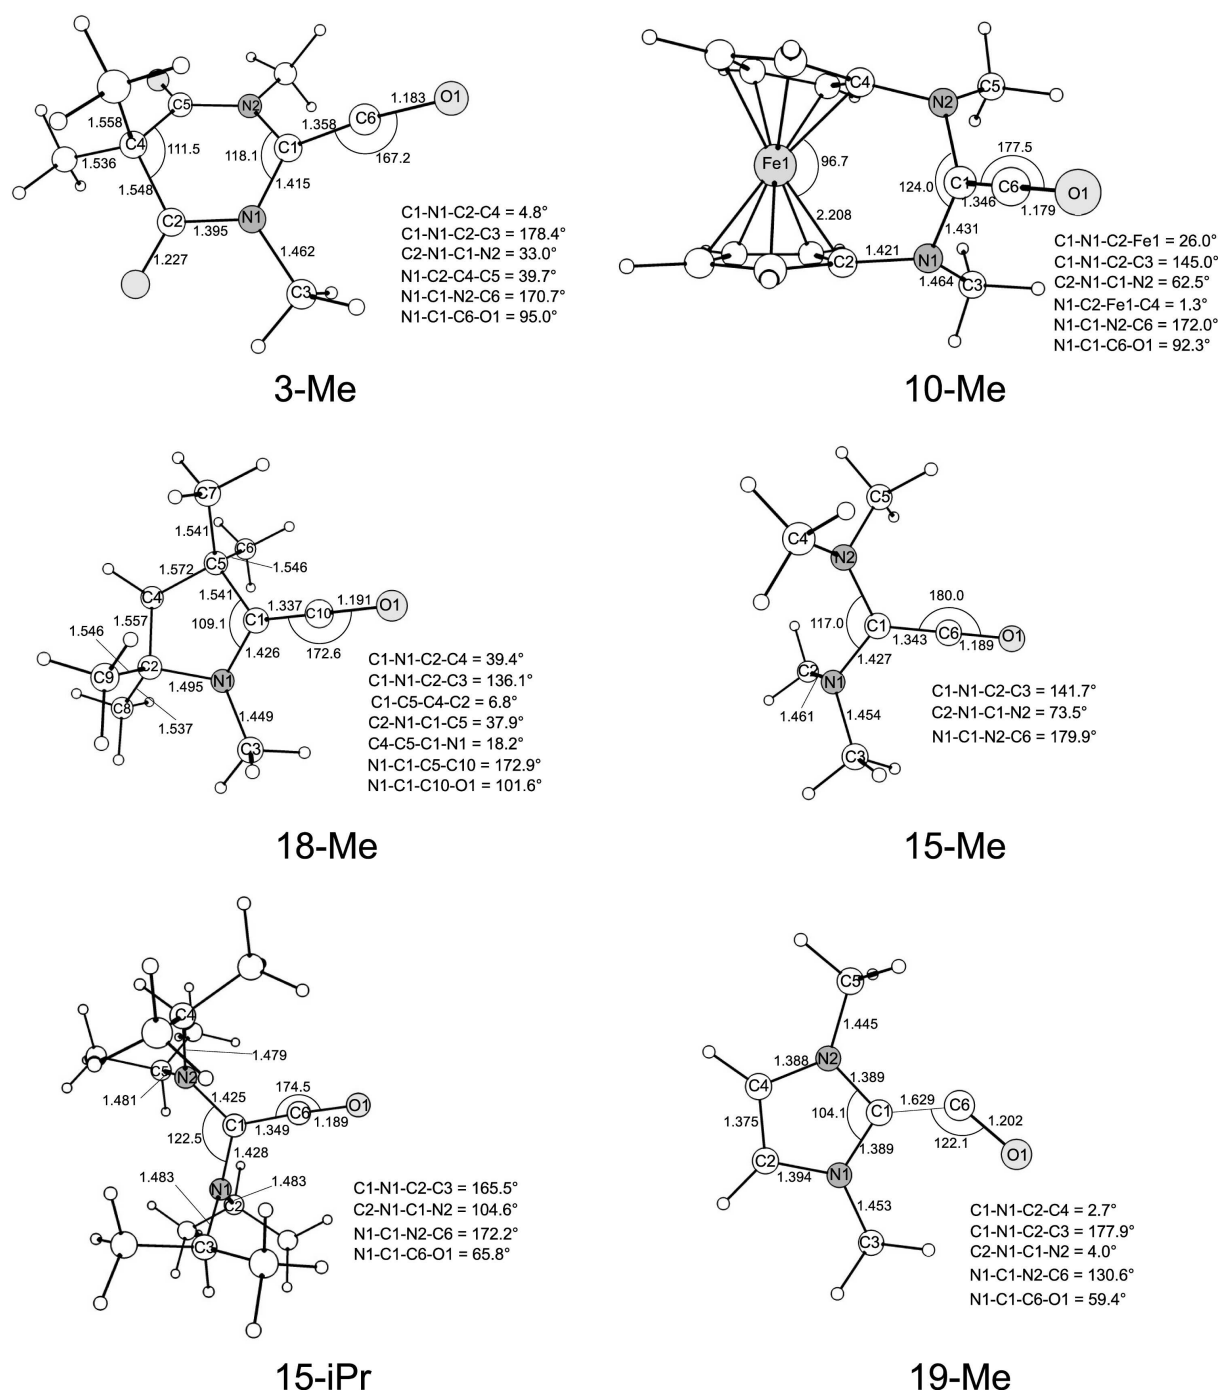

**Fig. S1** Calculated geometries of ketenes and CO adducts at BP86/def2-SVP. Distances are given in Å, angles in degrees.

**Table S1** Cartesian coordinates and energies at BP86/def2-SVP of the calculated molecules and transition states.

**1-Me**

**1-Me**, singlet carbene: E(BP86/def2-SVP)=-571.591208070 a.u.

|   |           |           |           |
|---|-----------|-----------|-----------|
| N | 1.421371  | -0.524684 | 0.313130  |
| C | 1.555646  | 0.767488  | -0.121576 |
| N | 0.423382  | 1.534417  | -0.040945 |
| C | -0.838288 | 1.149960  | 0.483836  |
| C | -1.044004 | -0.354786 | 0.679384  |
| C | 0.264641  | -1.125380 | 0.875401  |
| C | 0.543217  | 2.954769  | -0.416980 |
| O | -1.712215 | 1.976536  | 0.694393  |
| C | -2.008582 | -0.621212 | 1.848146  |
| C | -1.656184 | -0.882102 | -0.660520 |
| O | 0.321424  | -2.218632 | 1.416600  |
| C | 2.635150  | -1.361197 | 0.325388  |
| H | -1.839985 | -1.972020 | -0.575502 |
| H | -2.618498 | -0.366073 | -0.851822 |
| H | -0.981549 | -0.703387 | -1.522562 |
| H | -2.184952 | -1.708763 | 1.947212  |
| H | -1.587052 | -0.252351 | 2.804698  |
| H | -2.966173 | -0.096875 | 1.669887  |
| H | 1.549563  | 3.089103  | -0.849320 |
| H | -0.242259 | 3.224248  | -1.150792 |
| H | 0.415702  | 3.603748  | 0.472388  |
| H | 3.427015  | -0.786321 | -0.184677 |
| H | 2.936482  | -1.592652 | 1.366571  |
| H | 2.444270  | -2.320616 | -0.195304 |

**1-Me-trip**, triplet carbene: E(BP86/def2-SVP)=-571.523928130 a.u.

|   |           |           |           |
|---|-----------|-----------|-----------|
| N | 1.380835  | -0.585418 | 0.298641  |
| C | 1.286415  | 0.575352  | -0.413218 |
| N | 0.332515  | 1.515032  | -0.148424 |
| C | -0.849171 | 1.160331  | 0.544807  |
| C | -1.060342 | -0.359543 | 0.697276  |
| C | 0.266645  | -1.075364 | 1.020646  |
| C | 0.557772  | 2.914218  | -0.526100 |
| O | -1.639904 | 2.019396  | 0.937822  |
| C | -2.080104 | -0.631311 | 1.811693  |
| C | -1.576732 | -0.907917 | -0.668285 |
| O | 0.378221  | -2.024200 | 1.798445  |
| C | 2.660400  | -1.298608 | 0.370613  |
| H | -1.746136 | -2.001533 | -0.593972 |
| H | -2.536482 | -0.417962 | -0.931032 |
| H | -0.853392 | -0.721579 | -1.488943 |
| H | -2.243028 | -1.720975 | 1.915986  |
| H | -1.720200 | -0.244462 | 2.785241  |
| H | -3.037755 | -0.128672 | 1.577065  |
| H | 0.746917  | 2.989885  | -1.615980 |
| H | -0.357974 | 3.472074  | -0.254367 |
| H | 1.424841  | 3.335039  | 0.023405  |
| H | 3.428055  | -0.678598 | 0.877712  |
| H | 2.482725  | -2.219511 | 0.957130  |
| H | 3.014000  | -1.552456 | -0.649126 |

**TS-1-3-Me**, transition state of ketene formation: E(BP86/def2-SVP)=-684.815301778 a.u.

|   |           |           |           |
|---|-----------|-----------|-----------|
| C | -1.021913 | -0.329846 | 0.723343  |
| C | 0.295560  | -1.048097 | 1.026499  |
| N | 1.450581  | -0.447844 | 0.461514  |
| C | 1.534086  | 0.825940  | -0.028355 |
| N | 0.405942  | 1.594103  | 0.046084  |
| C | -0.850748 | 1.185506  | 0.566397  |
| O | 0.372144  | -2.093604 | 1.651347  |
| C | 2.694292  | -1.233064 | 0.552035  |
| C | 2.144553  | 0.756444  | -2.194761 |
| O | 3.262298  | 0.696107  | -2.486600 |
| C | 0.540623  | 2.991419  | -0.398545 |
| O | -1.742971 | 1.984252  | 0.803067  |
| C | -2.073385 | -0.650969 | 1.796532  |
| C | -1.485342 | -0.851853 | -0.678224 |
| H | -1.632563 | -1.949733 | -0.631547 |
| H | -2.448446 | -0.373044 | -0.947030 |
| H | -0.744649 | -0.625552 | -1.472426 |

|   |           |           |           |
|---|-----------|-----------|-----------|
| H | -2.213741 | -1.745841 | 1.869459  |
| H | -1.754789 | -0.279070 | 2.790729  |
| H | -3.032944 | -0.164377 | 1.539918  |
| H | 0.934232  | 2.998312  | -1.434934 |
| H | -0.454445 | 3.469509  | -0.359759 |
| H | 1.242134  | 3.540457  | 0.258431  |
| H | 3.014987  | -1.327053 | 1.608821  |
| H | 2.529842  | -2.252816 | 0.152800  |
| H | 3.470786  | -0.705422 | -0.028161 |

**3-Me**, ketene: E(BP86/def2-SVP)=-684.852199018 a.u.

|   |           |           |           |
|---|-----------|-----------|-----------|
| C | -1.013632 | -0.360324 | 0.608960  |
| C | 0.308491  | -1.072912 | 0.985324  |
| N | 1.447685  | -0.550033 | 0.373634  |
| C | 1.338063  | 0.610194  | -0.429256 |
| N | 0.372306  | 1.580501  | -0.070583 |
| C | -0.825713 | 1.173862  | 0.516438  |
| O | 0.364233  | -2.023702 | 1.758951  |
| C | 2.752656  | -1.171689 | 0.589805  |
| C | 2.002046  | 0.698601  | -1.610422 |
| O | 2.763211  | 0.897057  | -2.494167 |
| C | 0.645738  | 3.000542  | -0.282286 |
| O | -1.657029 | 1.979657  | 0.922919  |
| C | -2.083108 | -0.680128 | 1.663501  |
| C | -1.462534 | -0.878816 | -0.790237 |
| H | -1.622669 | -1.975393 | -0.748256 |
| H | -2.419437 | -0.397383 | -1.077362 |
| H | -0.716015 | -0.667241 | -1.583008 |
| H | -2.232781 | -1.774449 | 1.727572  |
| H | -1.778184 | -0.317757 | 2.664511  |
| H | -3.035105 | -0.183883 | 1.396128  |
| H | 0.738886  | 3.238428  | -1.364717 |
| H | -0.213462 | 3.559715  | 0.133969  |
| H | 1.579786  | 3.301729  | 0.235439  |
| H | 3.468472  | -0.441911 | 1.021424  |
| H | 2.597393  | -2.009899 | 1.295117  |
| H | 3.172501  | -1.572889 | -0.358681 |

**5-Me**

**5-Me**, singlet carbene: E(BP86/def2-SVP)=-1876.62158360 a.u.

|    |           |           |           |
|----|-----------|-----------|-----------|
| Fe | 0.029935  | 0.012553  | -0.040117 |
| C  | 1.453427  | 0.042617  | -1.397980 |
| C  | 1.584984  | 1.211057  | -0.544607 |
| C  | 1.759828  | 0.753145  | 0.808647  |
| C  | 1.780840  | -0.689246 | 0.798642  |
| C  | 1.619023  | -1.133253 | -0.560859 |
| C  | -1.398890 | 0.003304  | -1.392669 |
| C  | -1.527539 | -1.177801 | -0.556458 |
| C  | -1.696907 | -0.740246 | 0.804206  |
| C  | -1.717375 | 0.702140  | 0.815988  |
| C  | -1.560748 | 1.166499  | -0.537308 |
| N  | 1.202163  | 0.048992  | -2.812921 |
| N  | -1.153190 | 0.018101  | -2.808523 |
| C  | 0.023137  | 0.038691  | -3.497314 |
| C  | 2.431257  | 0.071101  | -3.618656 |
| C  | -2.385440 | 0.007966  | -3.609663 |
| H  | -2.089081 | 0.020218  | -4.674391 |
| H  | -2.990207 | -0.901451 | -3.398443 |
| H  | -3.014107 | 0.897590  | -3.384407 |
| H  | 2.130715  | 0.074730  | -4.682276 |
| H  | 3.036885  | 0.977278  | -3.396270 |
| H  | 3.060768  | -0.821772 | -3.409171 |
| H  | 1.572867  | -2.172638 | -0.911494 |
| H  | 1.906927  | -1.336786 | 1.676447  |
| H  | 1.867175  | 1.391853  | 1.695371  |
| H  | 1.508508  | 2.253401  | -0.880864 |
| H  | -1.452879 | -2.214996 | -0.908669 |
| H  | -1.801056 | -1.392193 | 1.681628  |
| H  | -1.839720 | 1.336436  | 1.703934  |
| H  | -1.515477 | 2.211026  | -0.872433 |

**5-Me-trip**, triplet carbene: E(BP86/def2-SVP)=-1876.56272112 a.u.

|    |          |           |           |
|----|----------|-----------|-----------|
| Fe | 0.032084 | -0.131449 | 0.034373  |
| C  | 1.467766 | 0.069574  | -1.372610 |
| C  | 1.698456 | 1.229759  | -0.546190 |
| C  | 1.939921 | 0.758671  | 0.778827  |



|   |           |           |           |
|---|-----------|-----------|-----------|
| C | 2.046251  | -0.678300 | 0.755639  |
| C | 1.754694  | -1.125766 | -0.567804 |
| C | -1.413872 | 0.029501  | -1.367242 |
| C | -1.664434 | -1.173334 | -0.561463 |
| C | -1.963409 | -0.734117 | 0.763088  |
| C | -1.897012 | 0.705255  | 0.785989  |
| C | -1.673673 | 1.182841  | -0.539881 |
| N | 1.202363  | 0.067520  | -2.787446 |
| N | -1.153783 | 0.034784  | -2.783057 |
| C | 0.022889  | 0.060954  | -3.464387 |
| C | 2.428093  | 0.061056  | -3.599942 |
| C | -2.381876 | -0.005771 | -3.590985 |
| H | -2.078798 | -0.006878 | -4.654015 |
| H | -2.973504 | -0.920884 | -3.367901 |
| H | -3.024663 | 0.877370  | -3.382875 |
| H | 2.121208  | 0.051453  | -4.661837 |
| H | 3.046856  | 0.961736  | -3.394196 |
| H | 3.045752  | -0.837245 | -3.379093 |
| H | 1.775561  | -2.154601 | -0.949474 |
| H | 2.272895  | -1.312537 | 1.623120  |
| H | 2.088664  | 1.390322  | 1.665061  |
| H | 1.560358  | 2.273049  | -0.856627 |
| H | -1.658083 | -2.202364 | -0.943126 |
| H | -2.169088 | -1.374393 | 1.631357  |
| H | -2.059977 | 1.332548  | 1.672817  |
| H | -1.565814 | 2.229560  | -0.850752 |

**TS-5-10-Me**, transition state of ketene formation: E(BP86/def2-SVP)=-1989.84428122 a.u.

|    |           |           |           |
|----|-----------|-----------|-----------|
| C  | 3.506869  | 0.785359  | -1.552996 |
| C  | 2.147311  | 0.477173  | -1.956951 |
| C  | 1.247137  | 1.222104  | -1.092578 |
| C  | 2.049719  | 1.926269  | -0.128149 |
| C  | 3.439058  | 1.655938  | -0.409364 |
| Fe | 2.407618  | -0.106231 | -0.096935 |
| C  | 1.025464  | -1.440819 | 0.547490  |
| C  | 1.906630  | -1.969411 | -0.479291 |
| C  | 3.262401  | -1.940286 | 0.040483  |
| C  | 3.217822  | -1.340728 | 1.348090  |
| C  | 1.842661  | -1.034732 | 1.659607  |
| N  | 1.503824  | -2.425773 | -1.777499 |
| C  | 1.323364  | -1.693473 | -2.913391 |
| C  | -0.577461 | -1.786650 | -3.444589 |
| O  | -1.031760 | -2.765431 | -3.904342 |
| N  | 1.761356  | -0.407261 | -3.017717 |
| C  | 1.455532  | 0.264839  | -4.286863 |
| C  | 1.246036  | -3.870970 | -1.864241 |
| H  | 0.397866  | 0.616796  | -4.306861 |
| H  | 2.198650  | -4.443419 | -1.823893 |
| H  | 0.735974  | -4.090195 | -2.820395 |
| H  | 1.606420  | -0.442631 | -5.123885 |
| H  | 0.151010  | 1.196184  | -1.147975 |
| H  | 1.670249  | 2.565857  | 0.679900  |
| H  | 4.297040  | 2.054920  | 0.147513  |
| H  | 4.413783  | 0.373579  | -2.014486 |
| H  | 4.158821  | -2.271104 | -0.500087 |
| H  | 4.081406  | -1.156148 | 2.000460  |
| H  | 1.481022  | -0.577607 | 2.590224  |
| H  | -0.062491 | -1.330451 | 0.451756  |
| H  | 2.128278  | 1.135302  | -4.416857 |
| H  | 0.604756  | -4.204252 | -1.021184 |

**10-Me**, ketene: E(BP86/def2-SVP)=-1989.87639932 a.u.

|    |           |           |           |
|----|-----------|-----------|-----------|
| C  | 3.187917  | 0.769168  | -1.703202 |
| C  | 1.776927  | 0.563550  | -1.980889 |
| C  | 1.026850  | 1.282727  | -0.971942 |
| C  | 1.963757  | 1.916732  | -0.081978 |
| C  | 3.295841  | 1.605701  | -0.534427 |
| Fe | 2.246764  | -0.118726 | -0.130153 |
| C  | 0.876065  | -1.410814 | 0.650597  |
| C  | 1.628532  | -2.031542 | -0.419735 |
| C  | 3.030761  | -1.997696 | -0.042390 |
| C  | 3.131112  | -1.365777 | 1.249164  |
| C  | 1.803442  | -0.999991 | 1.672363  |
| N  | 1.100047  | -2.458996 | -1.668696 |
| C  | 0.507641  | -1.424722 | -2.462086 |
| C  | -0.829931 | -1.434656 | -2.608552 |
| O  | -1.995970 | -1.468865 | -2.781240 |
| N  | 1.225904  | -0.295701 | -2.970083 |

|   |           |           |           |
|---|-----------|-----------|-----------|
| C | 1.997781  | -0.471938 | -4.201154 |
| C | 1.825475  | -3.521657 | -2.367340 |
| H | 2.254541  | 0.519519  | -4.628305 |
| H | 2.823899  | -3.206056 | -2.758068 |
| H | 1.218540  | -3.866780 | -3.227488 |
| H | 1.379185  | -1.018768 | -4.939850 |
| H | -0.067760 | 1.308514  | -0.893921 |
| H | 1.704659  | 2.539737  | 0.784342  |
| H | 4.231876  | 1.956365  | -0.079949 |
| H | 4.025889  | 0.355159  | -2.278448 |
| H | 3.868694  | -2.378049 | -0.640649 |
| H | 4.058221  | -1.204463 | 1.814847  |
| H | 1.540327  | -0.506040 | 2.617051  |
| H | -0.211587 | -1.263580 | 0.658917  |
| H | 2.947676  | -1.043448 | -4.060523 |
| H | 1.981919  | -4.381945 | -1.684167 |

**TS-10-11-Me**, transition state of formation of final product: E(BP86/def2-SVP)=-3866.50017705  
 a.u.

|    |           |           |           |
|----|-----------|-----------|-----------|
| C  | 5.836787  | -2.619064 | -0.250527 |
| C  | 6.076180  | -2.310424 | 1.138364  |
| C  | 4.853250  | -1.806868 | 1.706185  |
| C  | 3.858107  | -1.761913 | 0.649508  |
| C  | 4.464283  | -2.308556 | -0.551821 |
| Fe | 5.388248  | -0.641179 | 0.136720  |
| C  | 4.926252  | 0.707362  | -1.304387 |
| C  | 4.281109  | 0.971812  | -0.030536 |
| C  | 5.323260  | 1.212425  | 0.952304  |
| C  | 6.593182  | 1.027838  | 0.300680  |
| C  | 6.348738  | 0.717707  | -1.086959 |
| N  | 2.864495  | 0.996022  | 0.211719  |
| C  | 2.267083  | 2.318905  | -0.019509 |
| H  | 2.767586  | 3.087429  | 0.608409  |
| N  | 2.511706  | -1.271731 | 0.766640  |
| C  | 1.544780  | -2.311445 | 1.155683  |
| H  | 1.551365  | -3.144361 | 0.419404  |
| C  | 2.030364  | -0.020081 | 0.556947  |
| C  | -0.238336 | 0.139742  | -1.115403 |
| O  | 0.509355  | 0.175795  | -2.034253 |
| C  | -1.300362 | 0.247912  | -0.284120 |
| N  | -1.385862 | -0.350859 | 1.014321  |
| C  | -1.144559 | 0.522800  | 2.163394  |
| H  | -1.113944 | -0.085291 | 3.091098  |
| C  | -2.390753 | -1.341663 | 1.158816  |
| C  | -2.468286 | -2.591398 | 0.427548  |
| C  | -3.693212 | -3.254836 | 0.793330  |
| C  | -4.382368 | -2.429284 | 1.752833  |
| C  | -3.586564 | -1.248325 | 1.978108  |
| Fe | -4.059885 | -1.396902 | 0.001463  |
| C  | -5.004010 | -1.504443 | -1.820192 |
| C  | -3.673798 | -0.968923 | -1.951232 |
| C  | -3.578826 | 0.215562  | -1.122737 |
| C  | -4.871862 | 0.405120  | -0.486457 |
| C  | -5.745319 | -0.655730 | -0.921903 |
| N  | -2.402864 | 0.964638  | -0.869762 |
| C  | -2.576167 | 2.374886  | -0.522241 |
| H  | -3.239203 | 2.868453  | -1.263452 |
| H  | -5.133736 | 1.210109  | 0.212213  |
| H  | -6.796602 | -0.782648 | -0.631073 |
| H  | -5.388699 | -2.398399 | -2.328984 |
| H  | -2.853732 | -1.390871 | -2.546219 |
| H  | -3.843133 | -0.415522 | 2.645469  |
| H  | -5.337843 | -2.663729 | 2.240621  |
| H  | -4.034291 | -4.227622 | 0.414466  |
| H  | -1.728936 | -2.944620 | -0.302701 |
| H  | -1.589695 | 2.878239  | -0.552389 |
| H  | -3.011581 | 2.542079  | 0.493887  |
| H  | -1.914737 | 1.320991  | 2.299534  |
| H  | -0.148507 | 0.991440  | 2.028347  |
| H  | 4.403270  | 0.487419  | -2.244132 |
| H  | 7.116879  | 0.532268  | -1.849430 |
| H  | 7.578899  | 1.119067  | 0.775773  |
| H  | 5.156395  | 1.442119  | 2.012898  |
| H  | 3.965199  | -2.408284 | -1.524478 |
| H  | 6.572356  | -3.030358 | -0.954379 |
| H  | 7.025303  | -2.446326 | 1.673413  |
| H  | 4.700306  | -1.466649 | 2.738632  |
| H  | 1.195300  | 2.265032  | 0.243477  |

|   |          |           |           |
|---|----------|-----------|-----------|
| H | 2.367631 | 2.618496  | -1.084932 |
| H | 0.539816 | -1.847976 | 1.190153  |
| H | 1.802781 | -2.733580 | 2.151388  |

**11-Me**, final product: E(BP86/def2-SVP)=-3866.54521508 a.u.

|    |           |           |           |
|----|-----------|-----------|-----------|
| C  | 5.615419  | -2.482774 | 0.240203  |
| C  | 5.201223  | -2.276256 | 1.606230  |
| C  | 3.821316  | -1.869316 | 1.606839  |
| C  | 3.392647  | -1.774157 | 0.222306  |
| C  | 4.498383  | -2.199598 | -0.619220 |
| Fe | 4.896598  | -0.558180 | 0.497203  |
| C  | 4.891747  | 0.899753  | -0.909065 |
| C  | 3.821908  | 1.017347  | 0.067083  |
| C  | 4.427647  | 1.207082  | 1.373729  |
| C  | 5.853893  | 1.134715  | 1.208129  |
| C  | 6.138545  | 0.943218  | -0.192974 |
| N  | 2.418367  | 0.998003  | -0.199711 |
| C  | 1.859462  | 2.326819  | -0.520461 |
| H  | 2.526078  | 3.094342  | -0.086276 |
| N  | 2.101479  | -1.384627 | -0.249976 |
| C  | 1.210500  | -2.526369 | -0.501273 |
| H  | 0.396697  | -2.203630 | -1.176557 |
| C  | 1.646535  | -0.110692 | -0.419184 |
| C  | 0.313580  | 0.144567  | -1.127651 |
| O  | 0.504608  | 0.573969  | -2.318331 |
| C  | -0.860369 | 0.103440  | -0.360009 |
| N  | -0.834686 | -0.435319 | 0.989465  |
| C  | -0.671032 | 0.575772  | 2.042520  |
| H  | -0.554043 | 0.084723  | 3.031439  |
| C  | -1.828061 | -1.408779 | 1.280472  |
| C  | -2.093693 | -2.626377 | 0.534502  |
| C  | -3.244013 | -3.276214 | 1.110407  |
| C  | -3.703484 | -2.475893 | 2.215556  |
| C  | -2.836597 | -1.329253 | 2.324862  |
| Fe | -3.688519 | -1.381904 | 0.471440  |
| C  | -5.054292 | -1.378787 | -1.072912 |
| C  | -3.741080 | -1.003004 | -1.521532 |
| C  | -3.306790 | 0.153492  | -0.750216 |
| C  | -4.398279 | 0.495541  | 0.151062  |
| C  | -5.462425 | -0.453281 | -0.044031 |
| N  | -2.041016 | 0.777657  | -0.781886 |
| C  | -1.905966 | 2.077989  | -1.431606 |
| H  | -2.860173 | 2.344663  | -1.927447 |
| H  | -4.385534 | 1.322170  | 0.873850  |
| H  | -6.422414 | -0.466749 | 0.489327  |
| H  | -5.650522 | -2.219263 | -1.454028 |
| H  | -3.135451 | -1.510017 | -2.283854 |
| H  | -2.939806 | -0.520774 | 3.059023  |
| H  | -4.549552 | -2.705900 | 2.876757  |
| H  | -3.684336 | -4.221688 | 0.766441  |
| H  | -1.553226 | -2.963769 | -0.356853 |
| H  | -1.101316 | 2.030473  | -2.203759 |
| H  | -1.653717 | 2.889762  | -0.705980 |
| H  | -1.529896 | 1.287720  | 2.103908  |
| H  | 0.246041  | 1.164094  | 1.842732  |
| H  | 4.753222  | 0.755173  | -1.988299 |
| H  | 7.137932  | 0.859037  | -0.639939 |
| H  | 6.598409  | 1.219568  | 2.010441  |
| H  | 3.878478  | 1.331781  | 2.315995  |
| H  | 4.482127  | -2.240979 | -1.716155 |
| H  | 6.611006  | -2.808601 | -0.088263 |
| H  | 5.828223  | -2.418060 | 2.496242  |
| H  | 3.206910  | -1.621599 | 2.481966  |
| H  | 0.844282  | 2.423782  | -0.088368 |
| H  | 1.765353  | 2.437385  | -1.620061 |
| H  | 0.766245  | -2.895055 | 0.445566  |
| H  | 1.799514  | -3.339494 | -0.970629 |

**12-Me**

**12-Me**, singlet carbene: E(BP86/def2-SVP)=-407.575801820 a.u.

|   |           |           |           |
|---|-----------|-----------|-----------|
| C | 1.207724  | 0.852251  | -0.391373 |
| C | -0.077274 | 0.196468  | 0.120244  |
| N | 0.241479  | -0.401765 | 1.252739  |
| C | 1.689450  | -0.327427 | 1.745473  |
| C | 2.250270  | 0.739262  | 0.773015  |
| C | -0.734357 | -1.170387 | 2.027700  |

|   |           |           |           |
|---|-----------|-----------|-----------|
| C | 2.365448  | -1.704566 | 1.583043  |
| C | 1.749659  | 0.123100  | 3.215576  |
| C | 1.650097  | 0.075916  | -1.656773 |
| C | 0.925999  | 2.320625  | -0.772800 |
| H | 3.269545  | 0.478487  | 0.419801  |
| H | 2.333151  | 1.713792  | 1.298825  |
| H | -1.681466 | -1.169652 | 1.459281  |
| H | -0.392972 | -2.216625 | 2.177406  |
| H | -0.903983 | -0.714370 | 3.025729  |
| H | 3.427351  | -1.647410 | 1.900534  |
| H | 1.876189  | -2.479997 | 2.208734  |
| H | 2.340582  | -2.046193 | 0.528822  |
| H | 2.803917  | 0.308844  | 3.509194  |
| H | 1.183060  | 1.064898  | 3.369316  |
| H | 1.348039  | -0.645678 | 3.908365  |
| H | 0.844605  | 0.085854  | -2.418931 |
| H | 2.559044  | 0.539184  | -2.098049 |
| H | 1.882172  | -0.986129 | -1.432803 |
| H | 0.154649  | 2.375156  | -1.567704 |
| H | 0.550305  | 2.898672  | 0.097669  |
| H | 1.849758  | 2.816990  | -1.142760 |

**12-Me-trip**, triplet carbene: E(BP86/def2-SVP)=-407.501200753 a.u.

|   |           |           |           |
|---|-----------|-----------|-----------|
| C | 0.120476  | -0.008602 | 0.103026  |
| N | 0.127095  | -0.213588 | 1.477037  |
| C | 1.562445  | -0.116002 | 1.908986  |
| C | 2.090767  | 0.957040  | 0.899058  |
| C | 1.204498  | 0.895577  | -0.410479 |
| C | -0.773631 | -1.177932 | 2.074885  |
| C | 2.298062  | -1.463708 | 1.747930  |
| C | 1.654439  | 0.381279  | 3.360087  |
| H | 3.166029  | 0.802132  | 0.673472  |
| H | 1.986253  | 1.963198  | 1.355125  |
| C | 1.967319  | 0.288201  | -1.611666 |
| C | 0.690385  | 2.308117  | -0.794287 |
| H | -1.812064 | -0.946675 | 1.758599  |
| H | -0.562217 | -2.237664 | 1.779451  |
| H | -0.732120 | -1.107372 | 3.180716  |
| H | 3.382990  | -1.349503 | 1.952936  |
| H | 1.904339  | -2.226507 | 2.452403  |
| H | 2.177075  | -1.853665 | 0.716093  |
| H | 2.710682  | 0.597814  | 3.624632  |
| H | 1.061115  | 1.308685  | 3.494446  |
| H | 1.285099  | -0.377881 | 4.081564  |
| H | 1.283393  | 0.144641  | -2.474179 |
| H | 2.791869  | 0.957996  | -1.940741 |
| H | 2.400610  | -0.700756 | -1.359881 |
| H | 0.021352  | 2.253831  | -1.678448 |
| H | 0.115114  | 2.758870  | 0.040283  |
| H | 1.532559  | 2.990000  | -1.047711 |

**TS-12-18-Me**, transition state of ketene formation: E(BP86/def2-SVP)=-520.801900428 a.u.

|   |           |           |           |
|---|-----------|-----------|-----------|
| C | 1.330907  | 0.054759  | 1.896074  |
| C | 2.291846  | 0.052402  | 0.707705  |
| C | 1.414173  | 0.435693  | -0.529292 |
| C | -0.059995 | 0.200000  | -0.108193 |
| N | 0.105411  | 0.066372  | 1.402072  |
| C | 3.477511  | 1.017885  | 0.898894  |
| C | 2.842925  | -1.395787 | 0.603252  |
| C | -1.079707 | 0.034894  | 2.256263  |
| C | 1.595378  | 1.825669  | 3.332524  |
| O | 1.777359  | 1.645677  | 4.461923  |
| C | -0.656122 | -1.095547 | -0.694369 |
| H | 1.564128  | 1.509376  | -0.767562 |
| H | -1.556807 | 1.036746  | 2.312634  |
| H | -1.828698 | -0.688111 | 1.871935  |
| H | -0.767076 | -0.271272 | 3.270563  |
| H | 4.169749  | 0.957194  | 0.031464  |
| H | 3.134096  | 2.066865  | 0.999900  |
| H | 4.050718  | 0.760129  | 1.813081  |
| H | 3.550000  | -1.475018 | -0.250218 |
| H | 3.381207  | -1.675966 | 1.531411  |
| H | 2.035334  | -2.140846 | 0.449644  |
| H | 1.678121  | -0.138747 | -1.441260 |
| C | -0.961106 | 1.402092  | -0.443829 |
| H | -1.675092 | -1.295784 | -0.302192 |
| H | -0.741270 | -1.008674 | -1.797213 |
| H | -0.020875 | -1.975146 | -0.468116 |

|   |           |          |           |
|---|-----------|----------|-----------|
| H | -0.956228 | 1.580111 | -1.539280 |
| H | -2.016136 | 1.233056 | -0.142978 |
| H | -0.596327 | 2.324643 | 0.053536  |

**18-Me**, ketene: E(BP86/def2-SVP)=-520.846528702 a.u.

|   |           |           |           |
|---|-----------|-----------|-----------|
| C | 1.251684  | 0.201362  | 1.855424  |
| C | 2.323828  | 0.095651  | 0.754129  |
| C | 1.411229  | -0.081639 | -0.513988 |
| C | -0.069175 | 0.110945  | -0.071947 |
| N | 0.018575  | -0.314525 | 1.358813  |
| C | 3.213370  | 1.350720  | 0.668966  |
| C | 3.197732  | -1.160532 | 0.975086  |
| C | -1.146052 | -0.202713 | 2.213789  |
| C | 1.424755  | 0.821683  | 3.026992  |
| O | 1.636789  | 1.240311  | 4.121328  |
| C | -1.018340 | -0.816265 | -0.848207 |
| H | 1.687397  | 0.630793  | -1.318077 |
| H | -1.421976 | 0.852408  | 2.476009  |
| H | -2.021899 | -0.676694 | 1.727790  |
| H | -0.956554 | -0.744091 | 3.164936  |
| H | 3.955804  | 1.247838  | -0.150813 |
| H | 2.614296  | 2.264737  | 0.480670  |
| H | 3.780138  | 1.506980  | 1.611549  |
| H | 3.871288  | -1.333160 | 0.107131  |
| H | 3.829246  | -1.054259 | 1.881830  |
| H | 2.560679  | -2.059270 | 1.103351  |
| H | 1.541203  | -1.104529 | -0.922955 |
| C | -0.511197 | 1.584881  | -0.220018 |
| H | -2.077617 | -0.670821 | -0.549055 |
| H | -0.955914 | -0.607635 | -1.936198 |
| H | -0.749142 | -1.878477 | -0.675950 |
| H | -0.455519 | 1.911228  | -1.279282 |
| H | -1.558993 | 1.729677  | 0.117775  |
| H | 0.136913  | 2.256157  | 0.381237  |

**13-Me**

**13-Me**, singlet carbene: E(BP86/def2-SVP)=-306.952192893 a.u.

|   |           |           |           |
|---|-----------|-----------|-----------|
| C | 0.405980  | -1.034427 | -0.948756 |
| N | 1.519151  | -0.299802 | -0.695616 |
| N | -0.681762 | -0.455673 | -1.518642 |
| C | 1.734281  | 1.160187  | -0.667550 |
| C | 2.692636  | -1.051424 | -0.250922 |
| C | -1.885846 | -1.283847 | -1.582302 |
| C | -0.843638 | 0.838004  | -2.210634 |
| H | -1.331946 | 1.618608  | -1.582343 |
| H | 0.128031  | 1.220976  | -2.568217 |
| H | -1.488818 | 0.686587  | -3.102930 |
| H | -2.733362 | -0.807760 | -1.036958 |
| H | -2.210908 | -1.446180 | -2.636972 |
| H | -1.651846 | -2.255565 | -1.111316 |
| H | 3.552235  | -0.907316 | -0.945658 |
| H | 3.020671  | -0.727275 | 0.764789  |
| H | 2.419154  | -2.121740 | -0.229646 |
| H | 2.245210  | 1.550451  | -1.578146 |
| H | 0.780449  | 1.699236  | -0.532246 |
| H | 2.381352  | 1.408434  | 0.201387  |

**13-Me-trip**, triplet carbene: E(BP86/def2-SVP)=-306.886893925 a.u.

|   |           |           |           |
|---|-----------|-----------|-----------|
| C | 0.410578  | -0.796762 | -1.006066 |
| N | 1.573607  | -0.072932 | -0.781674 |
| N | -0.727146 | -0.212668 | -1.545816 |
| C | 1.562163  | 0.935173  | 0.283729  |
| C | 2.841408  | -0.767565 | -0.954187 |
| C | -2.017926 | -0.705520 | -1.086927 |
| C | -0.688270 | 0.198161  | -2.953366 |
| H | -1.492818 | 0.937506  | -3.158116 |
| H | 0.291611  | 0.674031  | -3.156945 |
| H | -0.815280 | -0.662071 | -3.657033 |
| H | -2.809805 | 0.045940  | -1.298291 |
| H | -2.317539 | -1.662824 | -1.583064 |
| H | -1.971681 | -0.887630 | 0.004746  |
| H | 3.662078  | -0.031853 | -1.101376 |
| H | 3.110136  | -1.403961 | -0.073768 |
| H | 2.778943  | -1.425196 | -1.843385 |
| H | 2.394982  | 1.656640  | 0.136251  |
| H | 0.602170  | 1.487003  | 0.239476  |

H 1.663813 0.486001 1.303135

**TS-13-15-Me**, transition state of ketene formation: E(BP86/def2-SVP)=-420.175511435 a.u.

H -2.050991 1.522925 -1.803910  
C -1.104018 1.015854 -2.108711  
N -1.171833 0.398313 -3.435895  
C -1.529282 -0.867974 -3.768984  
N -1.901133 -1.788688 -2.837858  
C -2.568863 -1.594342 -1.541106  
H -1.920379 -1.861286 -0.674997  
H -0.303629 1.784971 -2.113956  
C -1.002277 1.322456 -4.552511  
H -1.942947 1.880930 -4.769309  
H -0.725866 0.750211 -5.457431  
C -1.878156 -3.184716 -3.275683  
H -2.893357 -3.641771 -3.232830  
H -1.505766 -3.229221 -4.315276  
H -3.466090 -2.251248 -1.498588  
C -2.916646 -0.868413 -5.174840  
O -2.996039 -1.758028 -5.936926  
H -0.836891 0.265086 -1.342926  
H -0.197328 2.053302 -4.326703  
H -1.203275 -3.789001 -2.627996  
H -2.917865 -0.554696 -1.424072

**15-Me**, ketene: E(BP86/def2-SVP)=-420.209998657 a.u.

H -1.505761 2.025326 -2.340325  
C -0.832653 1.130066 -2.372011  
N -1.069934 0.270380 -3.528786  
C -2.191177 -0.604278 -3.412042  
N -2.048566 -1.726292 -2.541754  
C -3.223791 -2.176094 -1.812639  
H -2.911657 -2.837742 -0.975637  
H 0.218982 1.490250 -2.375485  
C -0.832291 0.903211 -4.816634  
H -1.521278 1.759555 -5.040460  
H -0.944626 0.154329 -5.626539  
C -1.196617 -2.798637 -3.049356  
H -1.714626 -3.463136 -3.788108  
H -0.311276 -2.346671 -3.538424  
H -3.954040 -2.757419 -2.434705  
C -3.328312 -0.384118 -4.091804  
O -4.335041 -0.189196 -4.693608  
H -0.989416 0.535597 -1.450397  
H 0.204186 1.303716 -4.848474  
H -0.840219 -3.431876 -2.208068  
H -3.757321 -1.301402 -1.388790

**13-iPr**

**13-iPr**, singlet carbene: E(BP86/def2-SVP)=-621.218464255 a.u.

C 1.891821 1.292667 -0.868263  
N 1.489165 -0.119620 -0.556648  
C 2.566299 -0.962756 0.063310  
C 0.282961 -0.725645 -0.619081  
N -0.789885 -0.238334 -1.280583  
C -0.889693 0.831181 -2.329465  
C -2.062053 -0.994373 -1.024573  
C -1.669276 2.065200 -1.843847  
H 0.149635 1.135112 -2.547186  
C -1.440928 0.294582 -3.665836  
C -2.476135 -0.888352 0.450377  
H -2.847093 -0.490259 -1.627563  
C -1.964727 -2.455332 -1.486624  
H 3.488363 -0.343355 0.050858  
C 2.247271 -1.320702 1.521915  
C 2.840778 -2.213287 -0.784669  
C 2.832730 1.385769 -2.081700  
H 0.954498 1.825340 -1.108454  
C 2.467603 2.024626 0.360726  
H -1.672048 2.864314 -2.616010  
H -2.728574 1.814096 -1.623969  
H -1.226761 2.483354 -0.916020  
H -1.362634 1.083372 -4.443544  
H -0.860985 -0.584369 -4.012379  
H -2.509181 0.001975 -3.605267  
H 2.615645 3.098143 0.118259

|   |           |           |           |
|---|-----------|-----------|-----------|
| H | 1.773782  | 1.962576  | 1.223132  |
| H | 3.451753  | 1.624059  | 0.679230  |
| H | 3.061589  | 2.444830  | -2.328363 |
| H | 3.799436  | 0.875792  | -1.884434 |
| H | 2.383238  | 0.911840  | -2.978856 |
| H | -2.915109 | -2.993945 | -1.288835 |
| H | -1.748581 | -2.524571 | -2.572433 |
| H | -1.141478 | -2.954988 | -0.937666 |
| H | -3.447456 | -1.398083 | 0.624846  |
| H | -1.701073 | -1.359825 | 1.087943  |
| H | -2.580504 | 0.171847  | 0.762322  |
| H | 3.678400  | -2.803936 | -0.356597 |
| H | 1.931259  | -2.846754 | -0.816409 |
| H | 3.106859  | -1.940312 | -1.827215 |
| H | 3.055499  | -1.943565 | 1.959262  |
| H | 2.135167  | -0.411956 | 2.148122  |
| H | 1.293471  | -1.884442 | 1.556448  |

**13-iPr-trip**, triplet carbene: E(BP86/def2-SVP)=-621.158281972 a.u.

|   |           |           |           |
|---|-----------|-----------|-----------|
| C | 1.635964  | 1.287098  | 0.093138  |
| N | 1.528992  | -0.024382 | -0.610524 |
| C | 2.737383  | -0.875031 | -0.712434 |
| C | 0.292771  | -0.646069 | -0.662961 |
| N | -0.805575 | -0.136860 | -1.335143 |
| C | -0.738475 | -0.020553 | -2.821256 |
| C | -2.134008 | -0.270838 | -0.693649 |
| C | -1.430033 | 1.256514  | -3.325493 |
| H | 0.349063  | 0.088378  | -3.022687 |
| C | -1.231218 | -1.278609 | -3.559216 |
| C | -2.269108 | 0.715593  | 0.478923  |
| H | -2.880936 | 0.013891  | -1.466362 |
| C | -2.441033 | -1.714406 | -0.246967 |
| H | 3.598725  | -0.221304 | -0.454001 |
| C | 2.724446  | -2.055883 | 0.279079  |
| C | 2.933179  | -1.363606 | -2.157834 |
| C | 2.599883  | 2.244068  | -0.626916 |
| H | 0.613668  | 1.713310  | 0.001302  |
| C | 1.959305  | 1.155674  | 1.592559  |
| H | -1.240309 | 1.392403  | -4.411123 |
| H | -2.532186 | 1.219080  | -3.190887 |
| H | -1.049665 | 2.151756  | -2.792711 |
| H | -1.024942 | -1.204083 | -4.648438 |
| H | -0.715733 | -2.181916 | -3.173075 |
| H | -2.326302 | -1.423563 | -3.440008 |
| H | 1.882144  | 2.140441  | 2.101272  |
| H | 1.248788  | 0.459074  | 2.083177  |
| H | 2.990661  | 0.777857  | 1.759858  |
| H | 2.549936  | 3.254731  | -0.169619 |
| H | 3.656510  | 1.908067  | -0.556867 |
| H | 2.339959  | 2.336726  | -1.701089 |
| H | -3.462325 | -1.785053 | 0.183436  |
| H | -2.373055 | -2.424106 | -1.095467 |
| H | -1.709269 | -2.036362 | 0.522550  |
| H | -3.264589 | 0.627829  | 0.962538  |
| H | -1.493616 | 0.500508  | 1.244046  |
| H | -2.138734 | 1.762748  | 0.137087  |
| H | 3.840751  | -1.996895 | -2.246310 |
| H | 2.057601  | -1.969447 | -2.473085 |
| H | 3.034627  | -0.509297 | -2.858012 |
| H | 3.665828  | -2.640695 | 0.207876  |
| H | 2.612628  | -1.705726 | 1.324608  |
| H | 1.871351  | -2.729146 | 0.054941  |

**TS-13-15-iPr**, transition state of ketene formation: E(BP86/def2-SVP)=-734.433203566 a.u.

|   |           |           |           |
|---|-----------|-----------|-----------|
| C | -1.491809 | 1.708238  | -1.757761 |
| C | -0.657250 | 0.560213  | -2.349259 |
| C | -1.206347 | 0.097661  | -3.714797 |
| N | -0.465741 | -0.588517 | -1.410029 |
| C | -1.706528 | -1.358705 | -1.089551 |
| C | -1.521104 | -2.872816 | -1.274086 |
| C | 0.735982  | -1.107786 | -1.044597 |
| N | 1.895113  | -0.420490 | -1.315230 |
| C | 3.125895  | -1.242211 | -1.512610 |
| C | 3.056431  | -1.959351 | -2.871790 |
| C | 2.122152  | 1.027119  | -1.001299 |
| C | 2.894363  | 1.195557  | 0.321183  |
| C | 2.781357  | 1.808680  | -2.151371 |
| C | 3.452499  | -2.233953 | -0.384245 |

|   |           |           |           |
|---|-----------|-----------|-----------|
| C | -2.300400 | -1.003563 | 0.288910  |
| H | 0.358775  | 0.937181  | -2.553298 |
| H | -2.451589 | -1.028906 | -1.844097 |
| H | 3.962229  | -0.512586 | -1.562449 |
| H | 1.115699  | 1.452636  | -0.823735 |
| H | -1.496733 | 2.576553  | -2.450257 |
| H | -2.549194 | 1.410038  | -1.599110 |
| H | -1.086329 | 2.049646  | -0.783019 |
| H | -1.167409 | 0.942979  | -4.433262 |
| H | -0.596117 | -0.730682 | -4.127476 |
| H | -2.262825 | -0.238863 | -3.668054 |
| H | 2.911835  | 2.265032  | 0.619026  |
| H | 2.401128  | 0.615090  | 1.127749  |
| H | 3.949162  | 0.860063  | 0.234338  |
| H | 2.851397  | 2.887360  | -1.897574 |
| H | 3.814280  | 1.453027  | -2.349066 |
| H | 2.209974  | 1.715023  | -3.098290 |
| H | -2.503772 | -3.379870 | -1.171570 |
| H | -1.115920 | -3.101366 | -2.280345 |
| H | -0.829953 | -3.295433 | -0.520836 |
| H | -3.294454 | -1.485192 | 0.401693  |
| H | -1.661240 | -1.353662 | 1.121060  |
| H | -2.439321 | 0.089731  | 0.403813  |
| H | 3.995448  | -2.514900 | -3.079344 |
| H | 2.216188  | -2.685195 | -2.871220 |
| H | 2.888238  | -1.238897 | -3.698637 |
| H | 4.430983  | -2.716534 | -0.590135 |
| H | 3.520264  | -1.733892 | 0.601410  |
| H | 2.688035  | -3.031574 | -0.315726 |
| C | 0.764627  | -1.615993 | 0.953290  |
| O | 0.623892  | -2.708751 | 1.351548  |

15-iPr, ketene: E(BP86/def2-SVP)=-734.473189449 a.u.

|   |           |           |           |
|---|-----------|-----------|-----------|
| C | -1.849010 | 1.553699  | -1.593701 |
| C | -0.838682 | 0.632009  | -2.307593 |
| C | -1.267892 | 0.324865  | -3.753110 |
| N | -0.488262 | -0.594267 | -1.554274 |
| C | -1.526827 | -1.630356 | -1.366996 |
| C | -0.962748 | -3.043853 | -1.588837 |
| C | 0.590332  | -0.467084 | -0.631270 |
| N | 1.931630  | -0.211261 | -1.048512 |
| C | 2.865137  | -1.325333 | -1.341307 |
| C | 2.590924  | -1.959566 | -2.718195 |
| C | 2.505871  | 1.144649  | -0.875957 |
| C | 3.452870  | 1.264757  | 0.336938  |
| C | 3.180453  | 1.659500  | -2.163055 |
| C | 2.911182  | -2.382674 | -0.224421 |
| C | -2.311096 | -1.565438 | -0.035452 |
| H | 0.123307  | 1.183963  | -2.381205 |
| H | -2.263913 | -1.443482 | -2.177474 |
| H | 3.875653  | -0.862603 | -1.388253 |
| H | 1.627632  | 1.794955  | -0.674067 |
| H | -1.947700 | 2.523385  | -2.126972 |
| H | -2.860758 | 1.097255  | -1.549863 |
| H | -1.522181 | 1.772263  | -0.555456 |
| H | -1.356749 | 1.265555  | -4.335472 |
| H | -0.522684 | -0.326869 | -4.252260 |
| H | -2.256554 | -0.179466 | -3.803836 |
| H | 3.799953  | 2.311991  | 0.463501  |
| H | 2.944970  | 0.960025  | 1.274484  |
| H | 4.358300  | 0.632687  | 0.213883  |
| H | 3.517181  | 2.709300  | -2.032451 |
| H | 4.076464  | 1.058829  | -2.427890 |
| H | 2.481202  | 1.623870  | -3.023179 |
| H | -1.755612 | -3.809693 | -1.458773 |
| H | -0.540331 | -3.152575 | -2.607930 |
| H | -0.159191 | -3.265795 | -0.855967 |
| H | -3.187288 | -2.247649 | -0.071870 |
| H | -1.688330 | -1.884868 | 0.825611  |
| H | -2.688366 | -0.544922 | 0.173890  |
| H | 3.342437  | -2.744350 | -2.950019 |
| H | 1.586505  | -2.425488 | -2.744011 |
| H | 2.630126  | -1.195135 | -3.520327 |
| H | 3.679792  | -3.152514 | -0.445537 |
| H | 3.154249  | -1.923478 | 0.755430  |
| H | 1.934955  | -2.900171 | -0.123193 |
| C | 0.440164  | -0.422619 | 0.708120  |
| O | 0.374490  | -0.474855 | 1.893697  |



**14-Me**

**14-Me**, singlet carbene: E(BP86/def2-SVP)=-304.575814617 a.u.

|   |           |           |           |
|---|-----------|-----------|-----------|
| N | -1.055989 | 0.127900  | 0.022455  |
| C | 0.010985  | 1.000030  | -0.001104 |
| N | 1.082113  | 0.132845  | -0.019275 |
| C | 0.702125  | -1.210447 | -0.007674 |
| C | -0.669639 | -1.213635 | 0.018959  |
| C | 2.463160  | 0.591064  | -0.047573 |
| C | -2.439220 | 0.579664  | 0.048173  |
| H | -1.379905 | -2.048671 | 0.035777  |
| H | 1.416329  | -2.042208 | -0.019314 |
| H | -2.995841 | 0.217621  | -0.842092 |
| H | -2.960274 | 0.223672  | 0.962097  |
| H | -2.426817 | 1.684961  | 0.044293  |
| H | 3.021074  | 0.238035  | 0.845496  |
| H | 2.986347  | 0.231034  | -0.958680 |
| H | 2.445544  | 1.696306  | -0.051537 |

**14-Me-trip**, triplet carbene: E(BP86/def2-SVP)=-304.443022249 a.u.

|   |           |           |           |
|---|-----------|-----------|-----------|
| C | -0.124790 | 0.035794  | -0.083156 |
| N | -0.023588 | -0.226019 | 1.340385  |
| C | 1.289294  | 0.098449  | 1.663151  |
| C | 2.044321  | 0.104502  | 0.503159  |
| N | 1.219028  | -0.214893 | -0.568698 |
| C | 1.571629  | -0.053430 | -1.957584 |
| H | 3.108567  | 0.344800  | 0.381076  |
| H | 1.607250  | 0.333302  | 2.687355  |
| C | -1.151113 | -0.070683 | 2.226066  |
| H | 2.631029  | -0.341495 | -2.109855 |
| H | 0.933795  | -0.712920 | -2.582651 |
| H | 1.427871  | 0.996995  | -2.316529 |
| H | -0.861414 | -0.365394 | 3.254533  |
| H | -1.538004 | 0.979477  | 2.246663  |
| H | -1.980430 | -0.728484 | 1.891557  |

**TS-14-19-Me**, transition state of co adduct formation: E(BP86/def2-SVP)=-417.793470052 a.u.

|   |           |           |           |
|---|-----------|-----------|-----------|
| C | -1.010165 | 0.688276  | 0.048779  |
| N | 0.296203  | 1.126232  | -0.120610 |
| C | 1.185630  | 0.063951  | -0.109038 |
| N | 0.370102  | -1.050226 | 0.000347  |
| C | -0.968785 | -0.684276 | 0.126124  |
| C | 2.440903  | 0.189781  | 1.040645  |
| O | 3.257972  | -0.678736 | 1.125345  |
| C | 0.893957  | -2.405723 | -0.052952 |
| C | 0.788086  | 2.485053  | -0.036239 |
| H | -1.863002 | 1.375129  | 0.086032  |
| H | -1.776745 | -1.414888 | 0.243190  |
| H | 1.245495  | 2.811855  | -0.991577 |
| H | -0.033314 | 3.174335  | 0.235790  |
| H | 1.578205  | 2.491691  | 0.757017  |
| H | 0.997264  | -2.756596 | -1.101315 |
| H | 1.899014  | -2.413867 | 0.418691  |
| H | 0.220529  | -3.092710 | 0.495907  |

**19-Me**, CO adduct: E(BP86/def2-SVP)=-417.793500475 a.u.

|   |           |           |           |
|---|-----------|-----------|-----------|
| C | -1.008401 | 0.687989  | 0.026098  |
| N | 0.298863  | 1.130696  | -0.120216 |
| C | 1.188522  | 0.064691  | -0.073712 |
| N | 0.371828  | -1.054624 | 0.016947  |
| C | -0.968044 | -0.683758 | 0.115982  |
| C | 2.410616  | 0.177934  | 0.997638  |
| O | 3.271455  | -0.656936 | 1.074344  |
| C | 0.895684  | -2.408830 | -0.036608 |
| C | 0.793252  | 2.484874  | -0.014608 |
| H | -1.863150 | 1.373291  | 0.037737  |
| H | -1.778883 | -1.412810 | 0.221784  |
| H | 1.268796  | 2.822742  | -0.957440 |
| H | -0.028173 | 3.175351  | 0.254322  |
| H | 1.573774  | 2.474006  | 0.791109  |
| H | 1.001350  | -2.760308 | -1.084932 |
| H | 1.901429  | -2.416719 | 0.434515  |
| H | 0.222674  | -3.096945 | 0.511651  |

15-iPr

15-iPr, ketene: E(BP86/def2-SVP)= -735.279 a.u.

|   |             |             |             |
|---|-------------|-------------|-------------|
| C | 0.16717600  | -0.14522500 | 0.37722900  |
| N | 1.31102200  | 0.26106300  | -0.37468800 |
| N | -1.18165600 | -0.05124600 | -0.09326200 |
| C | 0.32708300  | -0.57442500 | 1.64362700  |
| O | 0.47040600  | -1.00452800 | 2.74168900  |
| C | -1.80755100 | -1.16687100 | -0.84583600 |
| C | -2.09663200 | 0.91972300  | 0.55475200  |
| C | 1.61102000  | 1.71153800  | -0.52097300 |
| C | 2.48741600  | -0.62788700 | -0.54615700 |
| C | 0.78101600  | 2.34609400  | -1.65213000 |
| C | 1.49697100  | 2.50797800  | 0.79024500  |
| H | 2.67689600  | 1.76155000  | -0.83669400 |
| H | 2.98129100  | -0.27496600 | -1.48269900 |
| C | 3.53047800  | -0.50818200 | 0.58894300  |
| C | 2.11354100  | -2.09634700 | -0.77201000 |
| C | -1.37906200 | -1.16401100 | -2.32589100 |
| C | -1.61349700 | -2.54495400 | -0.18760000 |
| H | -2.90006300 | -0.96078700 | -0.82782300 |
| C | -2.93400500 | 0.31968700  | 1.70472300  |
| H | -1.42316600 | 1.68290500  | 1.00035500  |
| C | -3.00211900 | 1.64589500  | -0.45953200 |
| H | 1.81966600  | 3.55894700  | 0.63695500  |
| H | 0.45164000  | 2.53051200  | 1.16248700  |
| H | 2.12622100  | 2.06798100  | 1.59084100  |
| H | 1.08125500  | 3.40223400  | -1.82206700 |
| H | 0.92010800  | 1.78736400  | -2.59976300 |
| H | -0.29972700 | 2.32846200  | -1.40915900 |
| H | 4.43838200  | -1.10375900 | 0.35444000  |
| H | 3.85504600  | 0.54163200  | 0.74086700  |
| H | 3.12121700  | -0.88288300 | 1.55073000  |
| H | 3.02487500  | -2.67387000 | -1.03016300 |
| H | 1.67448400  | -2.55518500 | 0.13707800  |
| H | 1.38935400  | -2.20946500 | -1.60195900 |
| H | -2.18830800 | -3.32162500 | -0.73468400 |
| H | -0.54890300 | -2.85098400 | -0.18971500 |
| H | -1.96289300 | -2.53874000 | 0.86514000  |
| H | -1.89680100 | -1.96678300 | -2.89336300 |
| H | -1.61798400 | -0.19178600 | -2.80222400 |
| H | -0.28654600 | -1.32184000 | -2.42495300 |
| H | -3.55037300 | 1.10282900  | 2.19531200  |
| H | -3.63150900 | -0.46312200 | 1.33638900  |
| H | -2.28650700 | -0.13557600 | 2.48140200  |
| H | -3.57221400 | 2.45331000  | 0.04571700  |
| H | -2.40855000 | 2.10122700  | -1.27761700 |
| H | -3.74671600 | 0.96184300  | -0.91901500 |

TS-15-17-iPr, transition state of carbene formation: E(BP86/def2-SVP)=-735.252 a.u.

|   |             |             |             |
|---|-------------|-------------|-------------|
| C | -3.38679500 | -1.32222000 | 1.09113900  |
| C | -2.21982600 | -1.26012100 | 0.08828100  |
| N | -1.54374700 | 0.07012900  | 0.09919000  |
| C | -0.34951400 | 0.25074200  | 0.69490900  |
| C | 0.52403500  | -0.24199500 | 1.60014100  |
| N | 1.26460000  | -0.03270600 | 0.17386400  |
| C | 2.12150200  | 1.19057300  | 0.07032900  |
| C | 3.34575200  | 1.15917200  | 1.00783000  |
| C | -2.65275400 | -1.70036100 | -1.32077100 |
| C | -2.31712500 | 1.25755700  | -0.36112800 |
| C | -2.56706100 | 2.24882700  | 0.78623800  |
| C | -1.64262300 | 1.93591600  | -1.56314700 |
| O | 0.95939200  | -0.64218600 | 2.66357900  |
| C | 1.59832800  | -1.33314100 | -0.47996500 |
| C | 2.99450000  | -1.87710500 | -0.13248800 |
| C | 1.32979000  | -1.34970200 | -1.99686300 |
| C | 2.50786800  | 1.58555200  | -1.36313100 |
| H | -1.43867500 | -1.96652700 | 0.43988600  |
| H | -3.30096000 | 0.86760200  | -0.70013800 |
| H | 1.44163000  | 1.97880700  | 0.45882000  |
| H | 0.86464300  | -2.03335100 | -0.02094000 |
| H | -3.05855300 | -2.73335700 | -1.29365100 |
| H | -3.45140300 | -1.04821900 | -1.73373600 |
| H | -1.79893200 | -1.68772200 | -2.02781100 |
| H | -3.81346800 | -2.34657100 | 1.12945300  |
| H | -3.04591900 | -1.05344700 | 2.11135100  |
| H | -4.21060600 | -0.63313900 | 0.80664700  |
| H | -3.15202800 | 3.12404500  | 0.43397400  |

|   |             |             |             |
|---|-------------|-------------|-------------|
| H | -3.12362600 | 1.77021800  | 1.61733700  |
| H | -1.60053800 | 2.61414900  | 1.19187300  |
| H | -2.25155400 | 2.78752300  | -1.93230300 |
| H | -0.64657000 | 2.33025400  | -1.27237100 |
| H | -1.50027600 | 1.22313500  | -2.40130900 |
| H | 2.96309100  | 2.59816600  | -1.34923200 |
| H | 3.26067200  | 0.89935000  | -1.80290500 |
| H | 1.62816100  | 1.62033000  | -2.03630800 |
| H | 3.75889400  | 2.18517300  | 1.10733700  |
| H | 3.05971400  | 0.80161300  | 2.01630100  |
| H | 4.16037700  | 0.51271200  | 0.62492600  |
| H | 3.08673000  | -2.91933500 | -0.50510300 |
| H | 3.80494900  | -1.28707500 | -0.60713900 |
| H | 3.15504900  | -1.88758600 | 0.96321100  |
| H | 1.30403800  | -2.39895300 | -2.35925900 |
| H | 0.35340500  | -0.88195100 | -2.23314000 |
| H | 2.11418900  | -0.82248100 | -2.57401500 |

**17**, singlet carbene: E(BP86/def2-SVP)= -735.296 a.u.

|   |             |             |             |
|---|-------------|-------------|-------------|
| C | 0.67978500  | 0.25052300  | -0.76572500 |
| N | 1.78139600  | -0.01134600 | -0.10936700 |
| N | -1.67805000 | -0.08165100 | -0.15979600 |
| C | -0.48726500 | -0.63580300 | -0.61638000 |
| O | -0.40284700 | -1.80292600 | -1.05807800 |
| C | -2.87632100 | -0.94382000 | -0.23185600 |
| C | -1.63567900 | 1.31294600  | 0.31124400  |
| C | 1.93609100  | -1.08243800 | 0.94276900  |
| C | 3.03723500  | 0.72854700  | -0.50207500 |
| C | 2.70580100  | -2.28591100 | 0.38008600  |
| C | 2.52669500  | -0.53610100 | 2.25000200  |
| H | 0.89936600  | -1.41816700 | 1.14293700  |
| H | 3.85750100  | 0.29019600  | 0.10407800  |
| C | 3.34506500  | 0.50054000  | -1.98628000 |
| C | 2.90976300  | 2.21624400  | -0.15343100 |
| C | -3.73186800 | -0.93035900 | 1.04361000  |
| C | -3.71531200 | -0.71218200 | -1.50544200 |
| H | -2.43211900 | -1.95756800 | -0.33757200 |
| C | -1.55681000 | 1.45442000  | 1.84525000  |
| H | -0.65544300 | 1.67103900  | -0.10178700 |
| C | -2.72061000 | 2.21803100  | -0.29430200 |
| H | 2.49901600  | -1.32890400 | 3.02614000  |
| H | 3.58597800  | -0.22251200 | 2.14269000  |
| H | 1.94519300  | 0.32900500  | 2.62916600  |
| H | 2.73940400  | -3.09784900 | 1.13648400  |
| H | 2.18781700  | -2.67042100 | -0.52006900 |
| H | 3.75547200  | -2.03103000 | 0.12096600  |
| H | 4.28066900  | 1.02463300  | -2.27123100 |
| H | 3.46648300  | -0.57852000 | -2.21040900 |
| H | 2.50866300  | 0.88654500  | -2.60324600 |
| H | 3.84014600  | 2.75831900  | -0.42058200 |
| H | 2.06583000  | 2.66038600  | -0.72026600 |
| H | 2.72227900  | 2.36760100  | 0.92953200  |
| H | -4.46966900 | -1.52038200 | -1.61347500 |
| H | -4.26074300 | 0.25314600  | -1.48993300 |
| H | -3.06670100 | -0.73550300 | -2.40391200 |
| H | -4.52343100 | -1.70426900 | 0.96373400  |
| H | -3.12625700 | -1.16009300 | 1.94356500  |
| H | -4.24377400 | 0.04115000  | 1.20753100  |
| H | -1.29743600 | 2.49856400  | 2.12137500  |
| H | -2.51754800 | 1.20820700  | 2.34137800  |
| H | -0.77609500 | 0.78719100  | 2.26445300  |
| H | -2.53175900 | 3.27145600  | 0.00005900  |
| H | -2.71443000 | 2.16703500  | -1.40113500 |
| H | -3.73847400 | 1.95731300  | 0.06347800  |

**TS-17-16-iPr**, transition state of beta-lactam formation: E(BP86/def2-SVP)= -735.276 a.u.

|   |             |             |             |
|---|-------------|-------------|-------------|
| C | -0.55812000 | 0.22337500  | -0.37313400 |
| N | -1.81042400 | -0.10281800 | -0.07541900 |
| N | 1.71751000  | 0.16657900  | 0.04772700  |
| C | 0.62922800  | -0.63321700 | -0.34155900 |
| O | 0.70741800  | -1.81722600 | -0.72863600 |
| C | 3.10866000  | -0.16054500 | -0.33314600 |
| C | 1.28741100  | 1.38829500  | 0.65210100  |
| C | -2.92987500 | 0.74875700  | -0.59477500 |
| C | -2.26676100 | -1.31622400 | 0.68612200  |
| C | -3.21730800 | 1.89880100  | 0.38476000  |
| C | -2.66875700 | 1.24488400  | -2.01989800 |
| H | -3.82106600 | 0.08344900  | -0.62209600 |

|   |             |             |             |
|---|-------------|-------------|-------------|
| H | -3.25543700 | -1.03050600 | 1.11136600  |
| C | -2.46646700 | -2.49025700 | -0.29026400 |
| C | -1.35150300 | -1.68471100 | 1.85623400  |
| C | 3.60955100  | -1.39431300 | 0.44234100  |
| C | 3.26494300  | -0.32976400 | -1.85485200 |
| H | 3.71562600  | 0.71428100  | -0.01496500 |
| C | 1.94629400  | 2.65940100  | 0.14176200  |
| C | 1.03622900  | 1.36843900  | 2.15367100  |
| H | -3.56109500 | 1.78669300  | -2.39650600 |
| H | -1.79871600 | 1.92969600  | -2.05440800 |
| H | -2.45759200 | 0.39776100  | -2.70295800 |
| H | -4.09856700 | 2.48673500  | 0.05430800  |
| H | -3.42394200 | 1.52124300  | 1.40770000  |
| H | -2.34754600 | 2.58664000  | 0.43986000  |
| H | -2.87101000 | -3.37411500 | 0.24581600  |
| H | -3.18192800 | -2.22836500 | -1.09752900 |
| H | -1.49048000 | -2.75109900 | -0.74733000 |
| H | -1.82935300 | -2.49491800 | 2.44459800  |
| H | -0.37093400 | -2.05766400 | 1.50281300  |
| H | -1.19443900 | -0.82172800 | 2.53438500  |
| H | 4.32744900  | -0.51399700 | -2.11801000 |
| H | 2.65916200  | -1.18825100 | -2.20698300 |
| H | 2.92861900  | 0.57923000  | -2.39470000 |
| H | 4.66941100  | -1.60736000 | 0.18930000  |
| H | 3.54236900  | -1.22962900 | 1.53745500  |
| H | 2.99480900  | -2.27799400 | 0.18076400  |
| H | 1.39582400  | 3.55286400  | 0.50376000  |
| H | 2.99494100  | 2.76921400  | 0.50732700  |
| H | 1.96951700  | 2.69331700  | -0.96703100 |
| H | 0.34061500  | 2.17915100  | 2.46201200  |
| H | 0.60905400  | 0.40060100  | 2.47899400  |
| H | 1.98445000  | 1.52379400  | 2.72273000  |
| H | 0.02015600  | 1.32489900  | -0.03391500 |

16-iPr, beta-lactam: E(BP86/def2-SVP) = -735.325 a.u.

|   |             |             |             |
|---|-------------|-------------|-------------|
| C | 0.36564000  | -0.24057900 | -0.56934000 |
| N | 1.60655800  | 0.00617700  | 0.14463600  |
| N | -1.71975100 | -0.03783600 | -0.18664800 |
| C | -0.77758400 | 0.80562900  | -0.74102900 |
| O | -0.86825400 | 1.90957000  | -1.26209700 |
| C | -3.18877600 | -0.02005100 | -0.25557200 |
| C | -0.78070200 | -1.18079100 | 0.04789600  |
| C | 2.76404900  | -0.70447800 | -0.46655100 |
| C | 1.89924200  | 1.38300600  | 0.63408300  |
| C | 4.09371400  | -0.44975700 | 0.26428200  |
| C | 2.52800800  | -2.22530600 | -0.51474500 |
| H | 2.89798100  | -0.36116700 | -1.52987800 |
| H | 2.83035500  | 1.27053500  | 1.22443000  |
| C | 2.18339500  | 2.41111100  | -0.48355200 |
| C | 0.86179800  | 1.90293300  | 1.64290800  |
| C | -3.81327900 | -0.72253000 | 0.96134800  |
| C | -3.71671100 | 1.41838800  | -0.38425500 |
| H | -3.49668400 | -0.58399100 | -1.17147700 |
| C | -1.13723700 | -2.40388500 | -0.80801400 |
| C | -0.57033200 | -1.54705200 | 1.51698000  |
| H | 3.37663700  | -2.72481300 | -1.02606500 |
| H | 2.44827600  | -2.64185900 | 0.51208800  |
| H | 1.61014900  | -2.49785400 | -1.06962600 |
| H | 4.87783400  | -1.10043300 | -0.17376100 |
| H | 4.45384400  | 0.59366300  | 0.17621900  |
| H | 4.00751300  | -0.70464600 | 1.34228800  |
| H | 2.51907200  | 3.37568700  | -0.04599300 |
| H | 2.98972100  | 2.06069400  | -1.16223400 |
| H | 1.27317400  | 2.60042200  | -1.08681700 |
| H | 1.24068900  | 2.84061600  | 2.10072900  |
| H | -0.11321400 | 2.14666300  | 1.17891300  |
| H | 0.70133400  | 1.17018700  | 2.45962100  |
| H | -4.81983800 | 1.39427900  | -0.49992500 |
| H | -3.47732600 | 2.00449100  | 0.52764800  |
| H | -3.26888600 | 1.94548600  | -1.24611200 |
| H | -4.91946300 | -0.69487400 | 0.87998600  |
| H | -3.51252600 | -1.78632400 | 1.03826900  |
| H | -3.52331500 | -0.21119500 | 1.90277400  |
| H | -0.37749000 | -3.20357700 | -0.69207800 |
| H | -2.11312300 | -2.83836800 | -0.50449000 |
| H | -1.20266300 | -2.14017300 | -1.88481400 |
| H | 0.35008800  | -2.15605900 | 1.62290600  |
| H | -0.44231100 | -0.64060700 | 2.13784300  |

|   |             |             |             |
|---|-------------|-------------|-------------|
| H | -1.42059700 | -2.13399200 | 1.91996600  |
| H | 0.58180400  | -0.59756200 | -1.60619500 |

## References

- S1. U. Siemeling, C. Färber, M. Leibold, C. Bruhn, P. Mücke, R. F. Winter, B. Sarkar, M. von Hopffgarten and G. Frenking, *Eur. J. Inorg. Chem.*, 2009, 4607.
- S2. R. W. Alder, P. R. Allen, M. Murray and A. G. Orpen, *Angew. Chem. Int. Ed. Engl.*, 1996, **35**, 1121.
- S3. D. Selent, W. Baumann and A. Börner, DE 10333143 (17.07.2003/ 07.08.2008, Leibniz Institute of Catalysis e. V.).
- S4. D. H. Live, D. G. Davies, W. C. Agosta and D. Cowburn, *J. Am. Chem. Soc.*, 1984, **106**, 1939.
- S5. Stoe & Cie, *X-red ver. 1.31, Program for numerical absorption correction*, Darmstadt, 2004.
- S6. G. M. Sheldrick, *SHELXS 97 and SHELXL 97, Programs for crystal structure solution and refinement*, University of Göttingen, Germany, 1997.
- S7. A. D. Becke, *Phys. Rev. A*, 1988, **38**, 3098.
- S8. J. P. Perdew, *Phys. Rev. B*, 1986, **33**, 8822.
- S9. M. J. Frisch, G. W. Trucks, H. B. Schlegel, G. E. Scuseria, M. A. Robb, J. R. Cheeseman, J. A. Montgomery, Jr., T. Vreven, K. N. Kudin, J. C. Burant, J. M. Millam, S. S. Iyengar, J. Tomasi, V. Barone, B. Mennucci, M. Cossi, G. Scalmani, N. Rega, G. A. Petersson, H. Nakatsuji, M. Hada, M. Ehara, K. Toyota, R. Fukuda, J. Hasegawa, M. Ishida, T. Nakajima, Y. Honda, O. Kitao, H. Nakai, M. Klene, X. Li, J. E. Knox, H. P. Hratchian, J. B. Cross, V. Bakken, C. Adamo, J. Jaramillo, R. Gomperts, R. E. Stratmann, O. Yazyev, A. J. Austin, R. Cammi, C. Pomelli, J. W. Ochterski, P. Y. Ayala, K. Morokuma, G. A. Voth, P. Salvador, J. J. Dannenberg, V. G. Zakrzewski, S. Dapprich, A. D. Daniels, M. C. Strain, Ö. Farkas, D. K. Malick, A. D. Rabuck, K. Raghavachari, J. B. Foresman, J. V. Ortiz, Q. Cui, A. G. Baboul, S. Clifford, J. Cioslowski, B. B. Stefanov, G. Liu, A. Liashenko, P. Piskorz, I. Komaromi, R. L. Martin, D. J. Fox, T. Keith, M. A. Al-Laham, C. Y. Peng, A. Nanayakkara, M. Challacombe, P. M. W. Gill, B. Johnson, W. Chen, M. W. Wong, C. Gonzalez and J. Pople, *Gaussian 03, Revision E.01*.
- S10. F. Weigend and R. Ahlrichs, *Phys. Chem. Chem. Phys.*, 2005, **7**, 3297.
